# Supplementary material for: Facile Synthesis of ZnO/WO3 Nanocomposite Porous Films for High-Performance Gas Sensing of Multiple VOCs
Source: MDPI journal article supplement (doi:10.3390/nano13040733), 2023-02-15
Supplement: s1 [file s1]

## Supporting Information

### **Facile Synthesis of ZnO/WO<sub>3</sub> Nanocomposite Porous Films for High Performance Gas Sensing to Multiple VOCs**

Biao Lei,<sup>1,2</sup> Hongwen Zhang,<sup>1,3\*</sup> Qian Zhao,<sup>1</sup> Weiwei Liu,<sup>4</sup> Yi Wei,<sup>1,2</sup> Yanyan Lu,  
<sup>1,2</sup> Tingting Xiao,<sup>1</sup> Jinglin Kong,<sup>4\*</sup> and Weiping Cai<sup>1,2\*</sup>

<sup>1</sup> *Key Lab of Materials Physics, Anhui Key Lab of Nanomaterials and Nanotechnology, Institute of Solid State Physics, HFIPS, Chinese Academy of Sciences, Hefei 230031, P.R. China*

<sup>2</sup> *University of Science and Technology of China, Hefei 230026, P.R. China*

<sup>3</sup> *Lu'an Branch, Anhui Institute of Innovation for Industrial Technology, Lu'an 237100, P.R. China*

<sup>4</sup> *State Key Laboratory of NBC Protection for Civilian, Beijing 102205, China*

---

\* Address correspondence to hwzhang@issp.ac.cn, jlkong@sina.com, wpcai@issp.ac.cn

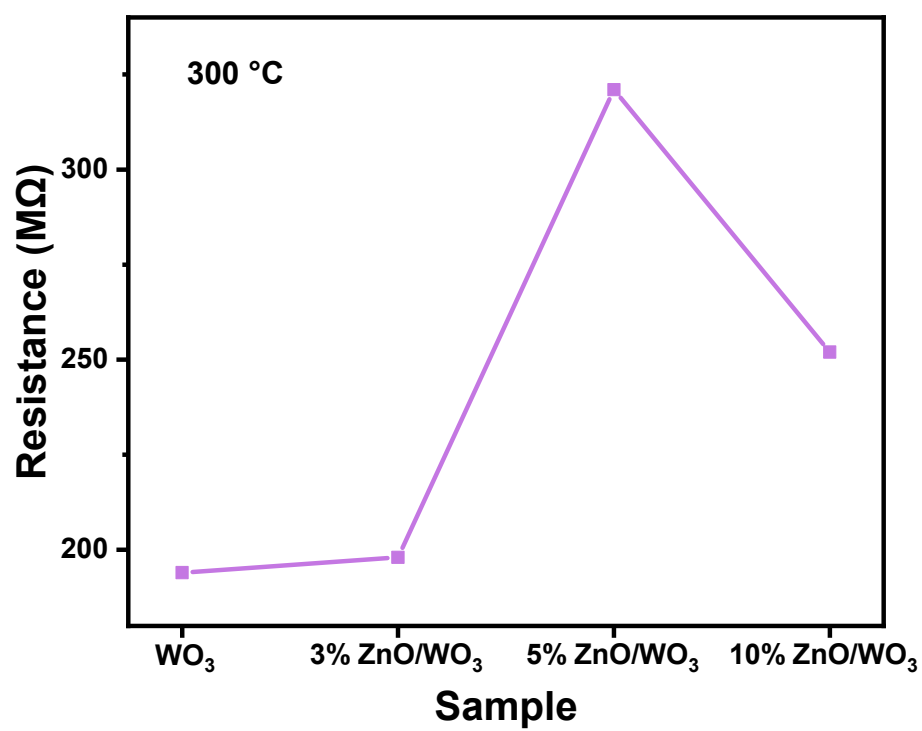

**Figure S1.** The initial resistance of the four sensors in air atmosphere at 300 °C.
